# Supplementary material for: Interrogating Parkinson's disease LRRK2 kinase pathway activity by assessing Rab10 phosphorylation in human neutrophils
Source: PubMed Central journal article supplement (PMC5748842; doi:10.1042/bcj20170803), 2018-01-02
Supplement: BCJ-475-23-s1.pdf [file BCJ-475-23-s1.pdf]

## Supplementary Figure 1

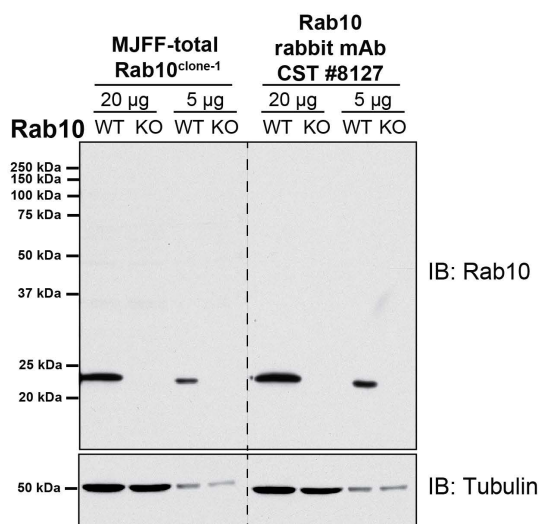

**Supplementary Figure 1. Characterisation of MJFF-total Rab10<sup>clone-1</sup> mouse monoclonal antibody.** The MJFF-total Rab10<sup>clone-1</sup> mouse monoclonal antibody produced by Nanotool Antibodies was used for immunoblot analysis of the indicated amounts of cell extracts derived from previously described wild type and Rab10 knock-out A549 [15]. For comparison, we undertook a side by side analysis with the best commercial Rab10 antibody that we have been using namely the Cell Signaling Technology (#8127) rabbit monoclonal antibody.

## Supplementary Figure 2

Donor 3

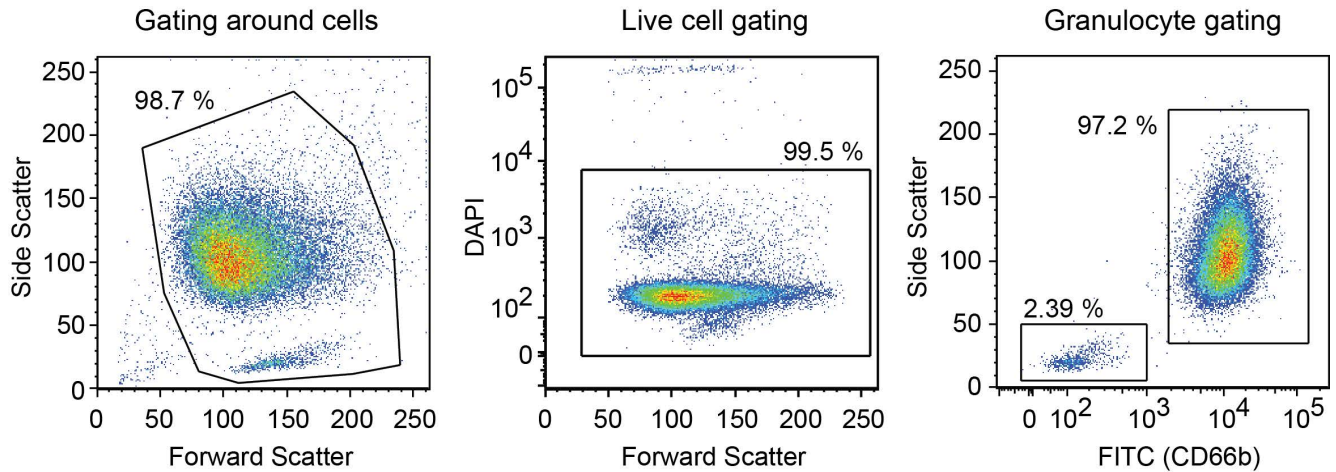

**Supplementary Figure 2. Flow cytometry analysis to determine the purity and viability of isolated neutrophils.** Purified neutrophils from 12 donors were stained with the granulocyte cell surface marker CD66b FITC and the cell viability dye DAPI. Cells were analysed by flow cytometry revealing that isolated cells had a viability >98 % and a purity >96 %. The data shown is from donor 3. Viability and purity data for all twelve donors is provided in Figure 2A.

### Supplementary Figure 3

**A**

Donor 1

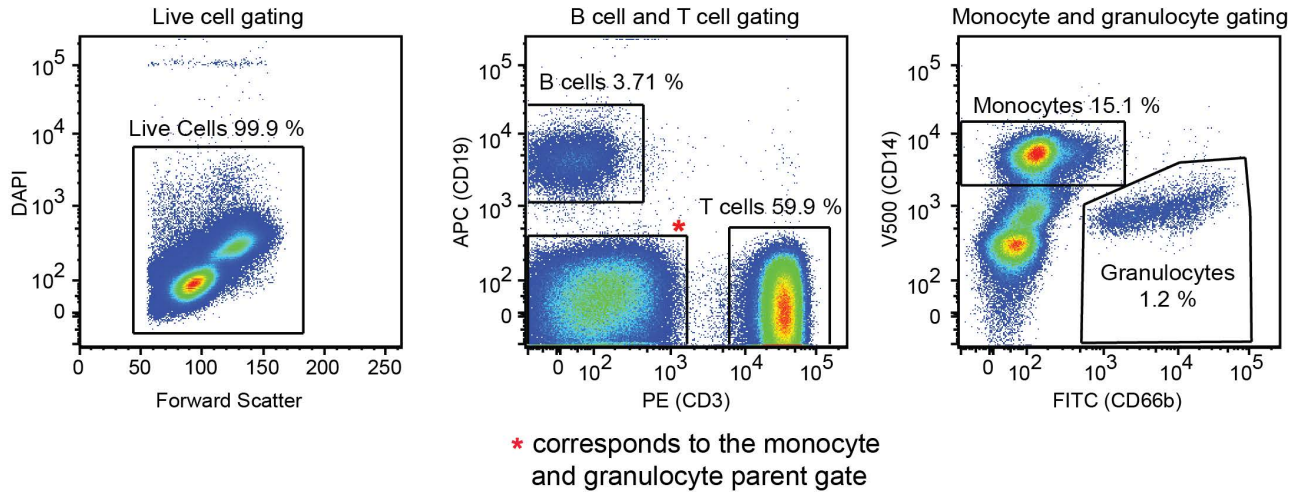

**B**

| Sample  | B cells (CD19 positive) | Granulocytes (CD66b positive) | Monocytes (CD14 positive) | T cells (CD3 positive) | Total |
|---------|-------------------------|-------------------------------|---------------------------|------------------------|-------|
| Donor 1 | 3.71                    | 1.2                           | 15.1                      | 59.9                   | 79.91 |
| Donor 2 | 7.78                    | 5.95                          | 6.56                      | 62.9                   | 83.19 |
| Donor 3 | 10.9                    | 2.59                          | 9.38                      | 55.1                   | 77.97 |
| Donor 4 | 8.08                    | 1.01                          | 10.3                      | 65.3                   | 84.69 |
| Donor 5 | 16.1                    | 4.1                           | 10                        | 55.4                   | 85.6  |
| Donor 6 | 13                      | 1.83                          | 7.86                      | 58.7                   | 81.39 |

**Supplementary Figure 3. Flow cytometry analysis to determine the composition of PBMCs.** PBMCs isolated from six donors were stained with CD19 APC (B cell marker), CD3 PE (T cell marker), CD14 V500 (monocyte marker), CD66b FITC (granulocyte marker) and the cell viability dye DAPI. (A) Flow cytometry plots and population gating for donor 1. (B) The proportion of B cells, granulocytes, monocytes and T cells in PBMC isolated from six donors. The data shown is the percentage of each sub-population relative to the total number of cells.

**Supplementary Table 1. Overview of demographics of clinical study participants.** Overview of demographics and clinical information for the 26 participants. Abbreviations: UPDRS = Unified Parkinson's Disease Rating Scale. NA = not applicable. LDDE = Levodopa daily dosage equivalent. DBS = Deep Brain Stimulation. MoCa = Montreal Cognitive Assessment. Values are median (range). Missing data = MD: \*\* MD from 4; \* MD from 1.

|                                 | <b>Control</b> | <b>Sporadic PD</b>     | <b>G2019S LRRK2 PD</b>  | <b>G2019S LRRK2 Carrier</b> |
|---------------------------------|----------------|------------------------|-------------------------|-----------------------------|
| <b>Number</b>                   | 13             | 7                      | 5                       | 1                           |
| <b>Age (years)</b>              | 70 (52;89)     | 69 (52; 80)            | 71 (40; 91)             | 65                          |
| <b>Gender</b>                   | 8M/5F          | 3M/4F                  | 1M/4F                   | 1M                          |
| <b>Disease duration (years)</b> | NA             | 13 (0; 30)             | 10 (1; 20)              | NA                          |
| <b>UPDRS-III</b>                | NA             | 35 (21; 48)**          | 27 (7; 38)              | 3                           |
| <b>UPDRS-IV</b>                 | NA             | 0**                    | 0                       | 0                           |
| <b>LDDE (mg)</b>                | NA             | 500 (0; 825)*<br>+2DBS | 500 (200; 800)<br>+1DBS | NA                          |
| <b>MoCa</b>                     | 25 (21; 30)    | 25 (18; 30)*           | 25 (12; 30)             | 30                          |

**Supplementary Table 2. Detailed information of clinical study participants.** A total of 26 participants were recruited; amongst them 5 patients with G2019S associated Parkinson's, 1 G2019S LRRK2 carrier, 7 patients with sporadic Parkinson's and 13 healthy controls. Abbreviations: UPDRS = Unified Parkinson's Disease Rating Scale. NA = not applicable. LDDE = Levodopa daily dosage (mg). DBS = Deep Brain Stimulation. MoCa = Montreal Cognitive Assessment. Values are median (range). Missing data = MD. TREND = Tuebinger evaluation of risk factors for early detection of neurodegeneration.

|    | Gender | Ethnicity | Age | Condition            | Disease duration | MDS-UPDRS III&IV | MoCa                   | LDDE      |
|----|--------|-----------|-----|----------------------|------------------|------------------|------------------------|-----------|
| 1  | female | caucasian | 65  | LRRK2 G2019S PD      | 1                | 7 / 0            | 27                     | 200       |
| 2  | male   | hispanic  | 75  | Sporadic PD          | 8                | md               | terminated after 30min | 400       |
| 3  | female | caucasian | 73  | Sporadic PD          | 30               | md               | md                     | 700 + DBS |
| 4  | female | caucasian | 67  | Sporadic PD          | 10               | 36               | 19                     | md        |
| 5  | female | caucasian | 52  | Control              | na               | na               | md                     | na        |
| 6  | female | caucasian | 59  | Control              | na               | na               | md                     | na        |
| 7  | male   | arab      | 40  | LRRK2 G2019S PD      | 4                | 29 / 0           | 30                     | 425       |
| 8  | male   | caucasian | 80  | Sporadic PD          | 16               | 48 / 0           | 18                     | 825       |
| 9  | female | caucasian | 70  | Control/TREND        | na               | na               | 26                     | na        |
| 10 | male   | caucasian | 76  | Control/TREND        | na               | na               | 23                     | na        |
| 11 | male   | caucasian | 76  | Control/TREND        | na               | na               | 25                     | na        |
| 12 | male   | caucasian | 78  | Control/TREND        | na               | na               | 21                     | na        |
| 13 | female | caucasian | 71  | Control/TREND        | na               | na               | 24                     | na        |
| 14 | male   | caucasian | 79  | Control/TREND        | na               | na               | 24                     | na        |
| 15 | female | caucasian | 61  | Sporadic PD          | 5                | 21 / 0           | 30                     | 200       |
| 16 | male   | caucasian | 78  | Control/TREND        | na               | na               | 22                     | na        |
| 17 | male   | caucasian | 68  | Control/TREND        | na               | na               | 26                     | na        |
| 18 | male   | caucasian | 89  | Control              | na               | na               | md                     | na        |
| 19 | female | caucasian | 86  | LRRK2 G2019S PD      | 16               | na               | 12                     | 675       |
| 20 | male   | caucasian | 65  | LRRK2 G2019S carrier | na               | 3                | 30                     | Na        |
| 21 | female | caucasian | 66  | Control              | na               | na               | 30                     | na        |
| 22 | female | caucasian | 91  | LRRK2 G2019S PD      | 9                | 38 / 0           | 28                     | 800       |
| 23 | male   | caucasian | 68  | Control/TREND        | na               | na               | 27                     | Na        |
| 24 | female | caucasian | 73  | Sporadic PD          | 25               | md               | 29                     | 350 + DBS |
| 25 | male   | caucasian | 52  | Sporadic PD          | 1                | md               | 30                     | None      |
| 26 | female | caucasian | 71  | LRRK2 G2019S PD      | 20               | 36               | 26                     | 400 + DBS |
